# Supplementary material for: From Water Source to Tap of Ceramic Filters—Factors That Influence Water Quality Between Collection and Consumption in Rural Households in Nepal
Source: PubMed Central journal article supplement (PMC6266981; doi:10.3390/ijerph15112439), 2018-11-01
Supplement: ijerph-15-02439-s001.pdf [file ijerph-15-02439-s001.pdf]

**Table S1**

**Frequencies: Interview & Observation:**

**Water use, handling transport container, handling ceramic water filter, Use and condition of hygiene infrastructure**

|                                                               | N     |         | Percentag   | Median  | Mean    | Std. Deviation |
|---------------------------------------------------------------|-------|---------|-------------|---------|---------|----------------|
|                                                               | Valid | Missing |             |         |         |                |
| People in the household                                       | 42    | 0       |             | 6.000   | 5.881   | 1.8637         |
| Nr. of school going children in household                     | 42    | 0       |             | 1.000   | .762    | .8782          |
| Time required to collect water                                | 42    | 0       |             | 2.000   | 3.000   | 3.1623         |
| Amount of water collected per day in L                        | 42    | 0       |             | 56.000  | 61.143  | 22.6173        |
| <b>Main water source used to collect drinking water</b>       |       |         |             |         |         |                |
| piped source at household level                               | 42    |         | 11.9        |         |         |                |
| piped source in the village                                   | 42    |         | 66.7        |         |         |                |
| protected source (well, spring)                               | 42    |         | 16.7        |         |         |                |
| dangling pipe                                                 | 42    |         | 4.80        |         |         |                |
| <b>Observation: use and cleaning of transport container</b>   |       |         |             |         |         |                |
| <b>Container used to collect drinking water today</b>         |       |         |             |         |         |                |
| Gagri aluminium                                               | 42    | 0       | 21.40       |         |         |                |
| Plastic bucket                                                | 42    | 0       | 21.40       |         |         |                |
| Gagri copper                                                  | 42    | 0       | 16.70       |         |         |                |
| Jerrycan plastic                                              | 42    | 0       | 28.60       |         |         |                |
| Other container                                               | 42    | 0       | 11.90       |         |         |                |
| Containers with a lid                                         | 42    | 0       | 40.5        |         |         |                |
| <b>Materials used to clean the transport container</b>        |       |         |             |         |         |                |
| soft cloth                                                    | 42    | 0       | 16.7        |         |         |                |
| hands                                                         | 42    | 0       | 95.2        |         |         |                |
| soap                                                          | 42    | 0       | 16.7        |         |         |                |
| raw water                                                     | 42    | 0       | 100         |         |         |                |
| ash                                                           | 42    | 0       | 4.8         |         |         |                |
| rough cloth                                                   | 42    | 0       | 4.8         |         |         |                |
| Mean time required to clean the transport container (Min.)    | 42    | 0       |             |         | 1.83    | 1.7            |
| Clean transport container everyday                            | 42    | 0       | 97.60       |         |         |                |
| Do not have extra storage container available                 | 40    | 2       | 95.00       |         |         |                |
| Use a filter since Nr. of months                              | 42    | 0       |             | 14.000  | 19.190  | 10.0468        |
| Have replaced candle                                          | 40    | 2       | 27.50       |         |         |                |
| Candle replacement Nr of months ago                           | 11    | 31      |             | 6.00    | 5.09    | 3.477          |
| Candle_age (months)                                           | 42    | 0       |             | 12.0000 | 15.2381 | 10.59178       |
| Have received an instruction on filter O&M (yes)              | 42    | 0       | 35.70       |         |         |                |
| Frequency of filling the filter per day                       | 42    | 0       |             | 2.000   | 2.095   | .5763          |
| Candles are well screwed into the filter                      | 42    | 0       | 70          |         |         |                |
| <b>Frequency of cleaning the filter</b>                       |       |         |             |         |         |                |
| clean filter_ once per week                                   | 42    | 0       | 50.00       |         |         |                |
| clean filter_ every 3rd day                                   | 42    | 0       | 28.60       |         |         |                |
| clean filter_ every 2nd day                                   | 42    | 0       | 7.10        |         |         |                |
| clean filter_ every day                                       | 42    | 0       | 14.30       |         |         |                |
| Frequency of washing hands with soap per day                  | 42    | 0       |             | 4.000   | 4.214   | 2.2145         |
| <b>Observation: Cleaning of ceramic water filters</b>         |       |         |             |         |         |                |
| Unscrew candle for cleaning                                   | 42    | 0       | 4.8         |         |         |                |
| Pour water out from clean water reservoir                     | 42    | 0       | 58.5        |         |         |                |
| Clean parts touch dirty surface                               | 42    | 0       | <b>82.9</b> |         |         |                |
| Bottom of raw water reservoir touches dirty surface           | 42    | 0       | 47.5        |         |         |                |
| Outflow of ceramic water candle touches dirty surface         | 42    | 0       | 65          |         |         |                |
| Inside of clean water reservoir touches dirty tool            | 42    | 0       | 35          |         |         |                |
| Tap touches dirty surface or dirty tool                       | 42    | 0       | 45          |         |         |                |
| <b>Materials used to clean the filter outside</b>             |       |         |             |         |         |                |
| soft cloth                                                    | 42    | 0       | 41          |         |         |                |
| rough cloth                                                   | 42    | 0       | 12.8        |         |         |                |
| brush                                                         | 42    | 0       | 2.6         |         |         |                |
| hands                                                         | 42    | 0       | <b>97.4</b> |         |         |                |
| soap                                                          | 42    | 0       | 79.5        |         |         |                |
| raw water                                                     | 42    | 0       | <b>94.9</b> |         |         |                |
| boiled water                                                  | 42    | 0       | 5.1         |         |         |                |
| chlorine                                                      | 42    | 0       | 0           |         |         |                |
| ash                                                           | 42    | 0       | 5.1         |         |         |                |
| earth                                                         | 42    | 0       | 0           |         |         |                |
| <b>Materials used to clean the raw water reservoir inside</b> |       |         |             |         |         |                |
| soft cloth                                                    | 42    | 0       | 22          |         |         |                |
| rough cloth                                                   | 42    | 0       | 0           |         |         |                |
| brush                                                         | 42    | 0       | 22          |         |         |                |
| hands                                                         | 42    | 0       | <b>95.1</b> |         |         |                |
| soap                                                          | 42    | 0       | 31.7        |         |         |                |

|                                                                   |    |   |        |  |  |
|-------------------------------------------------------------------|----|---|--------|--|--|
| raw water                                                         | 42 | 0 | 95.1   |  |  |
| boiled water                                                      | 42 | 0 | 4.9    |  |  |
| chlorine                                                          | 42 | 0 | 0      |  |  |
| ash                                                               | 42 | 0 | 4.9    |  |  |
| earth                                                             | 42 | 0 | 0      |  |  |
| <b>Materials used to clean the candle</b>                         |    |   |        |  |  |
| soft cloth                                                        | 42 | 0 | 7.3    |  |  |
| rough cloth                                                       | 42 | 0 | 0      |  |  |
| brush                                                             | 42 | 0 | 48.8   |  |  |
| hands                                                             | 42 | 0 | 78     |  |  |
| soap                                                              | 42 | 0 | 19.5   |  |  |
| raw water                                                         | 42 | 0 | 90.2   |  |  |
| boiled water                                                      | 42 | 0 | 12.2   |  |  |
| chlorine                                                          | 42 | 0 | 0      |  |  |
| ash                                                               | 42 | 0 | 0      |  |  |
| earth                                                             | 42 | 0 | 0      |  |  |
| <b>Materials used to clean the clean water reservoir inside</b>   |    |   |        |  |  |
| soft cloth                                                        | 42 | 0 | 23     |  |  |
| rough cloth                                                       | 42 | 0 | 2.6    |  |  |
| brush                                                             | 42 | 0 | 12.8   |  |  |
| <b>hands</b>                                                      | 42 | 0 | 94.9   |  |  |
| soap                                                              | 42 | 0 | 30.8   |  |  |
| <b>raw water</b>                                                  | 42 | 0 | 89.7   |  |  |
| <b>boiled water</b>                                               | 42 | 0 | 5.1    |  |  |
| chlorine                                                          | 42 | 0 | 0      |  |  |
| ash                                                               | 42 | 0 | 2.6    |  |  |
| earth                                                             | 42 | 0 | 0      |  |  |
| <b>Materials used to clean the tap of the filter</b>              |    |   |        |  |  |
| soft cloth                                                        | 42 | 0 | 31.4   |  |  |
| rough cloth                                                       | 42 | 0 | 2.8    |  |  |
| brush                                                             | 42 | 0 | 13.9   |  |  |
| hands                                                             | 42 | 0 | 75     |  |  |
| soap                                                              | 42 | 0 | 41.7   |  |  |
| raw water                                                         | 42 | 0 | 86.1   |  |  |
| boiled water                                                      | 42 | 0 | 5.6    |  |  |
| chlorine                                                          | 42 | 0 | 0      |  |  |
| ash                                                               | 42 | 0 | 5.6    |  |  |
| earth                                                             | 42 | 0 | 0      |  |  |
| <b>Materials used to clean the lid of the filter</b>              |    |   |        |  |  |
| soft cloth                                                        | 42 | 0 | 44.4   |  |  |
| rough cloth                                                       | 42 | 0 | 11.1   |  |  |
| brush                                                             | 42 | 0 | 8.3    |  |  |
| hands                                                             | 42 | 0 | 100    |  |  |
| soap                                                              | 42 | 0 | 72.2   |  |  |
| raw water                                                         | 42 | 0 | 94.4   |  |  |
| boiled water                                                      | 42 | 0 | 5.6    |  |  |
| chlorine                                                          | 42 | 0 | 0      |  |  |
| ash                                                               | 42 | 0 | 5.6    |  |  |
| earth                                                             | 42 | 0 | 0      |  |  |
| Hands touch clean parts of the filter during the cleaning process |    |   | 100    |  |  |
| <b>Observation: Hygiene conditions</b>                            |    |   |        |  |  |
| Household saying that they are boiling drinking water             | 42 | 0 | 4.80   |  |  |
| Chlorine for drinking water treatment available                   | 42 | 0 | 0.00   |  |  |
| Filter for drinking water treatment available                     | 42 | 0 | 100.00 |  |  |
| Filter candle has cracks                                          | 42 | 0 | 4.80   |  |  |
| Water sealed toilet in household                                  | 42 | 0 | 97.60  |  |  |
| Pitlatrine in household                                           | 42 | 0 | 2.40   |  |  |
| <b>Condition of toilet</b>                                        |    |   |        |  |  |
| Toilet is clean (no visible traces of faeces)                     | 42 | 0 | 100.00 |  |  |
| Cleaning brush is available in toilet                             | 40 | 2 | 90.00  |  |  |
| Water to flush available in toilet                                | 40 | 2 | 97.50  |  |  |
| Cleaning soap available in toilet                                 | 40 | 2 | 65.00  |  |  |
| Slippers available in toilet                                      | 40 | 2 | 35.00  |  |  |
| <b>Type of handwashing facilities in household</b>                |    |   |        |  |  |
| bucket with a tap                                                 | 42 | 0 | 90.50  |  |  |
| piped handwashing station                                         | 42 | 0 | 4.80   |  |  |
| no handwashing station                                            | 42 | 0 | 4.80   |  |  |
| <b>Condition of handwashing facilities</b>                        |    |   |        |  |  |
| handwashing facilities in good condition (no damages)             | 40 | 2 | 95.00  |  |  |
| soap available next to handwashing facilities                     | 40 | 2 | 87.50  |  |  |
| handwashing facilities clean                                      | 40 | 2 | 90.00  |  |  |
| water available next to handwashing facilities                    | 40 | 2 | 97.50  |  |  |
